# Supplementary material
Source: HighWire-hosted journal article supplement (http://www.jneurosci.org/highwire/filestream/598168/field_highwire_adjunct_files/4/Supplementary_Table_2.pdf)
Supplement: Supplementary_Table_2.pdf [file Supplementary_Table_2.pdf]

**Supplementary table 2.**

| Region | mEPSC Rise<br>time (ms) | mEPSC Decay<br>time (ms) | N   |
|--------|-------------------------|--------------------------|-----|
| CA3    | 1.4 ± 0.1               | 4.2 ± 0.2                | 242 |
| CA1    | 2.3 ± 0.2               | 4.6 ± 0.3                | 88  |
| Cortex | 1.6 ± 0.1               | 3.1 ± 0.2                | 143 |

**Supplementary table 2 legend:** mEPSCs display much faster kinetics with respect to SICs. Mean rise and decay time for mEPSCs recorded in different brain regions in 0 extracellular  $Mg^{2+}$ , picrotoxin 50-100  $\mu M$ , and TTX 1  $\mu M$ .
